# Supplementary material for: Site-specific ligation of anthracene-1,8-dicarboxylates to an Mn12 core: a route to the controlled functionalisation of single-molecule magnets
Source: Royal Society of Chemistry journal article supplement (doi:10.1039/b411320a), 2004-01-01
Supplement: b411320a.doc [file b411320a.doc]

Site-specific ligation of anthracene-1,8-dicarboxylates to Mn12 core: a route to the controlled functionalisation of Single-Molecule Magnets

Mirko Pacchioni, Andrea Cornia, Antonio C. Fabretti, Laura Zobbi, Daniele Bonacchi, Andrea Caneschi, Guillaume Chastanet, Dante Gatteschi and Roberta Sessoli

**Supporting** **information**

**Figure A**: Hystereses curves recorded at different temperature at the 5 kOe/min speed on an oriented single crystal of **3**.

**Figure B**: First derivative of the hysteresis curve recorded at 2.1 K. The peaks indicate the position of the steps and are separated by 4.7 kOe.
